# Supplementary material for: Acute Plasmodium berghei Mouse Infection Elicits Perturbed Erythropoiesis With Features That Overlap With Anemia of Chronic Disease
Source: PubMed Central journal article supplement (PMC7176981; doi:10.3389/fmicb.2020.00702), 2020-04-16

FIGURE S1

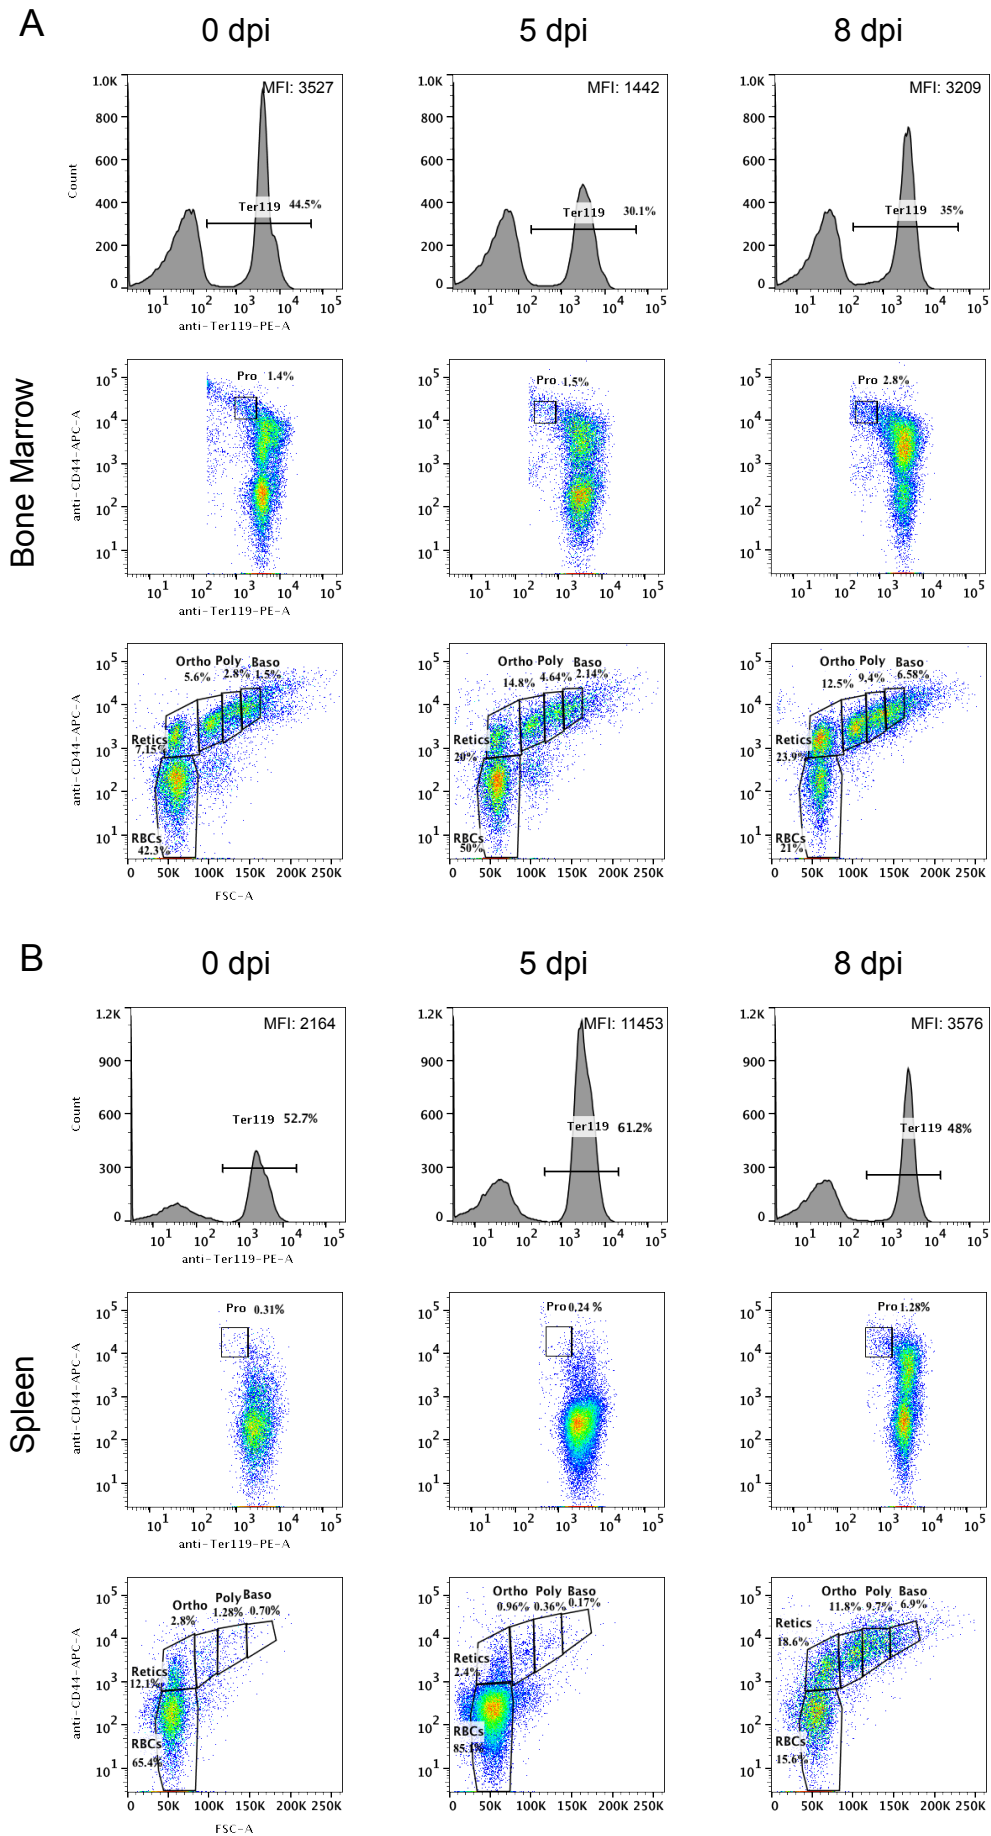

FIGURE S2

A

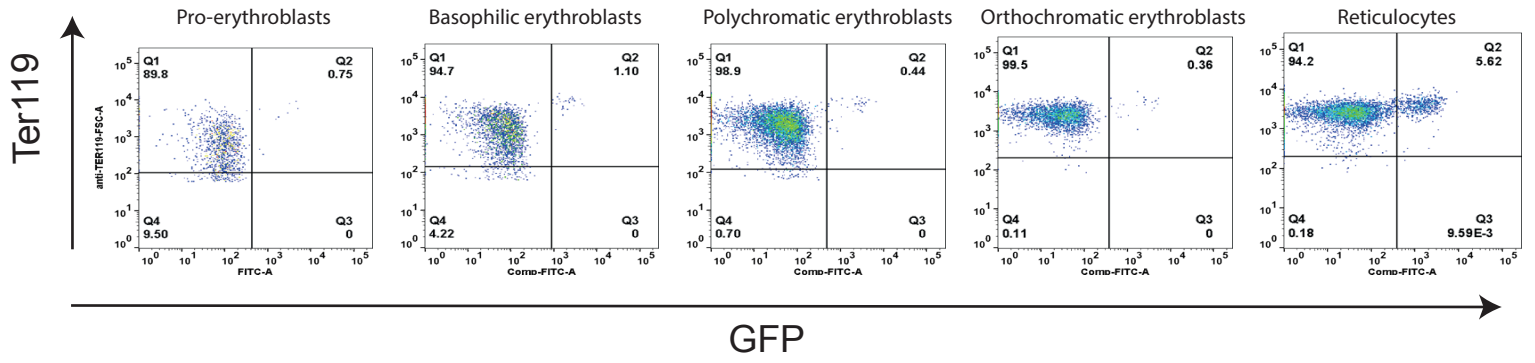

B

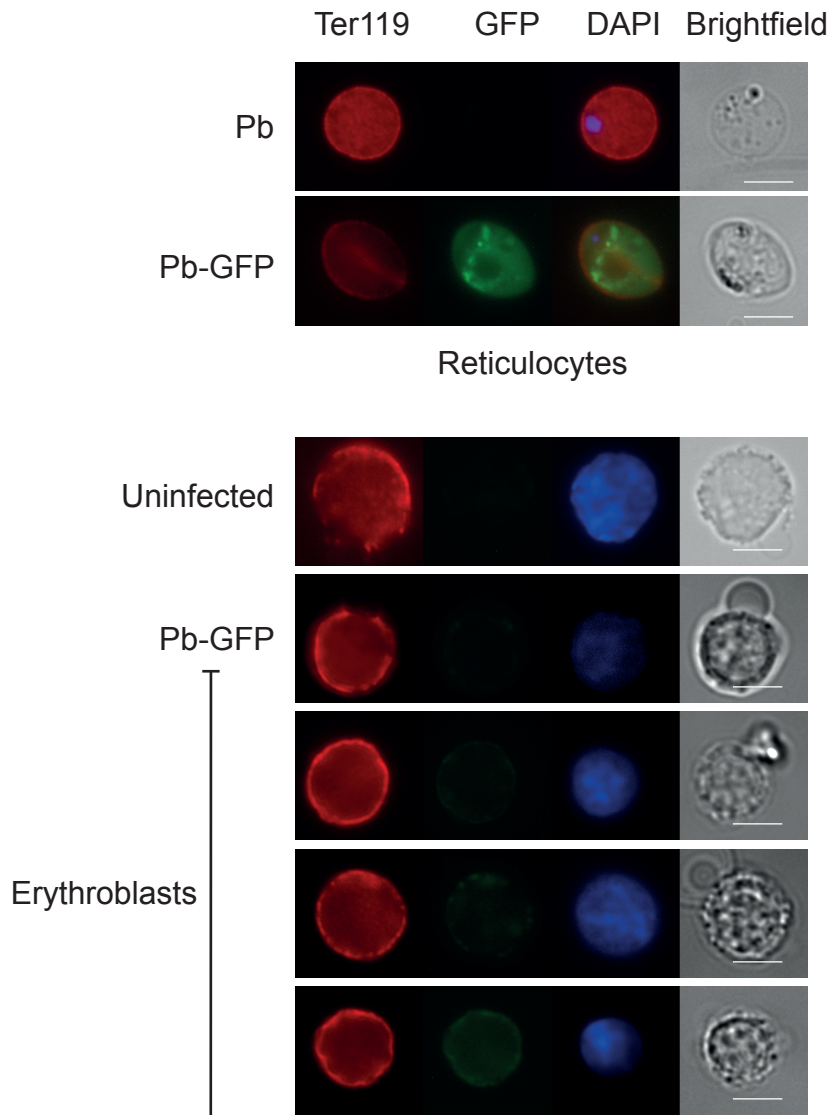

FIGURE S3

A

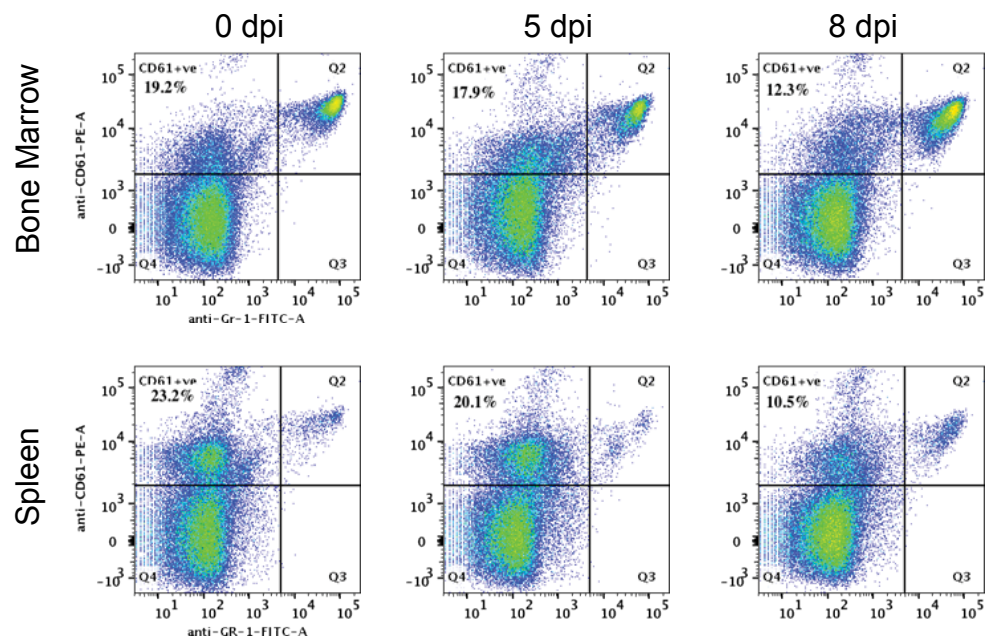

B

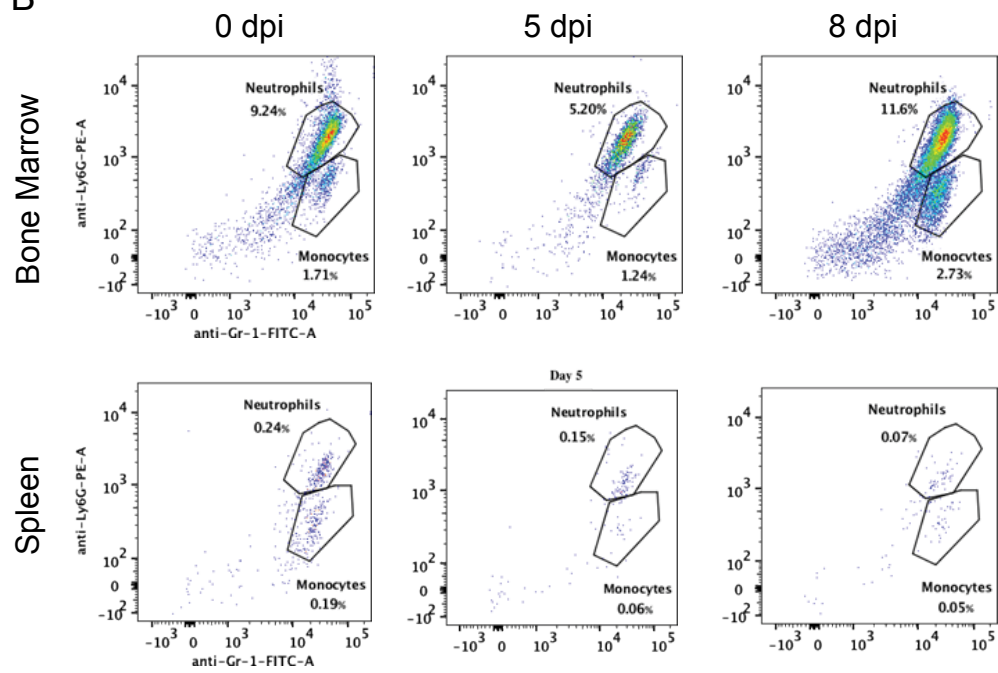

FIGURE S4

A

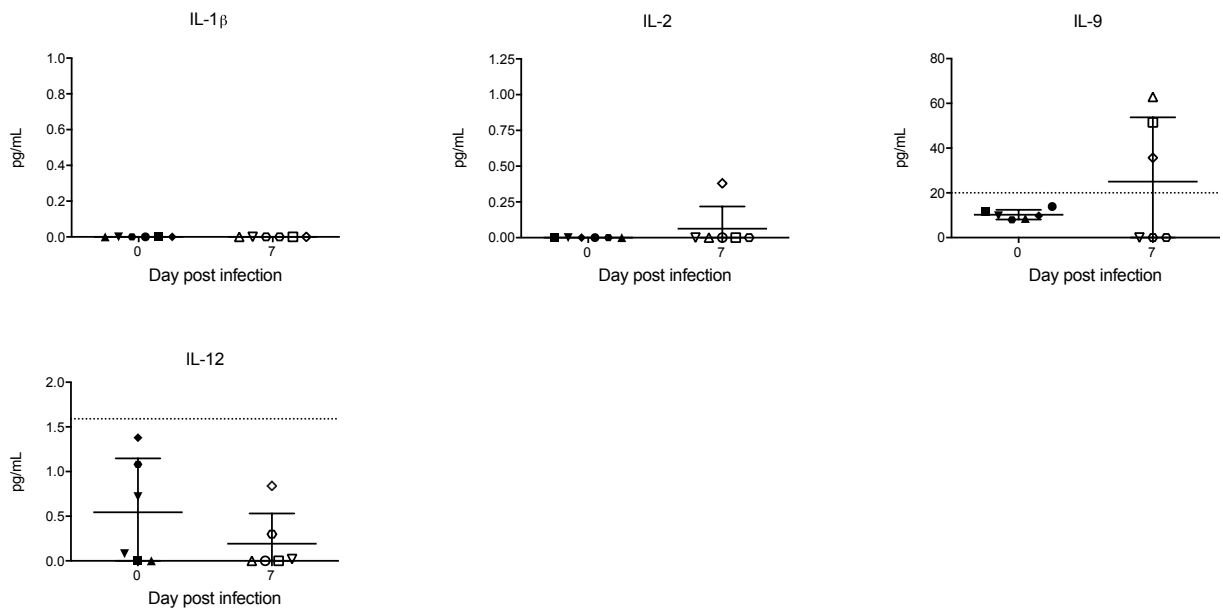

B

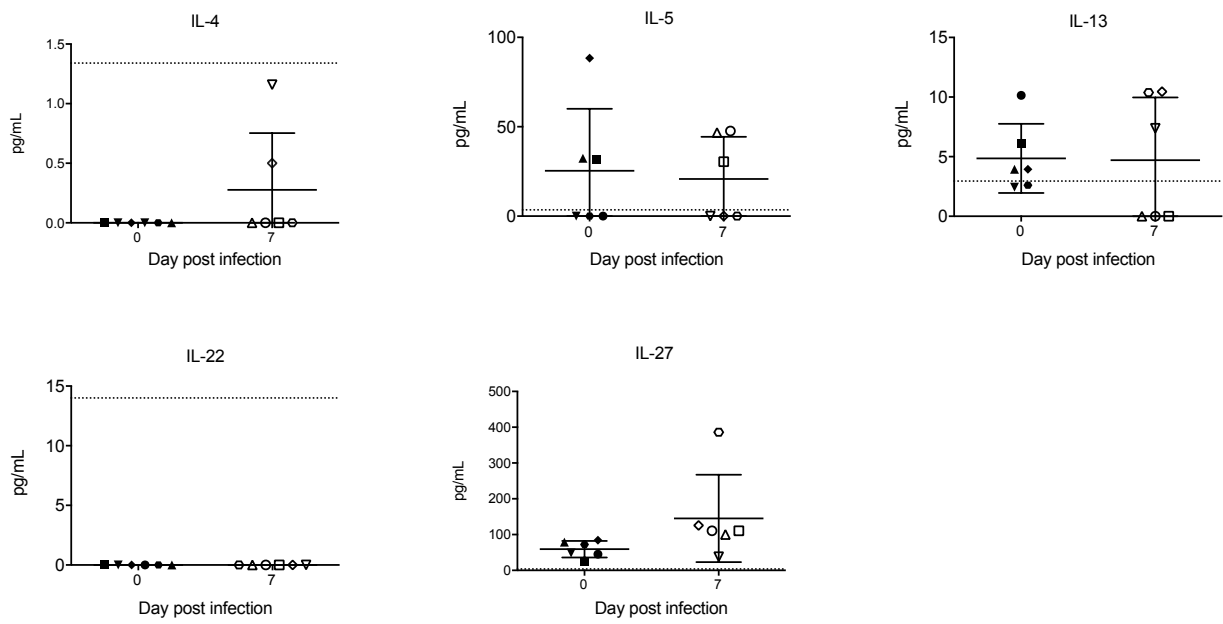

C

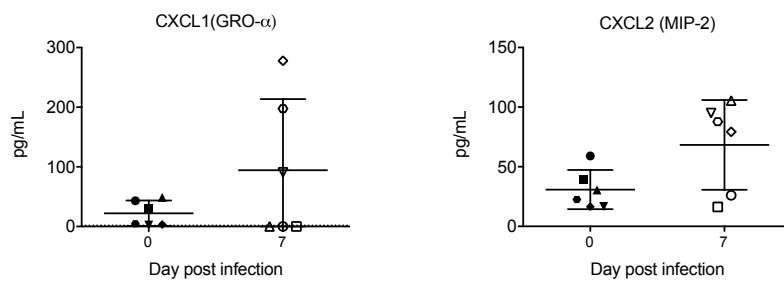

Supplement: Data_Sheet_1.pdf [file Data_Sheet_1.pdf]
